# Supplementary material for: Neutrophil lymphocyte ratio as an indicator for disease progression in Idiopathic Pulmonary Fibrosis
Source: PubMed Central journal article supplement (PMC9207910; doi:10.1136/bmjresp-2022-001202), 2022-06-16
Supplement: bmjresp-2022-001202supp001.pdf [file bmjresp-2022-001202supp001.pdf]

## Supplementary file

| <b>Outcome</b><br>[adjusted for age, gender, baseline FVC%, steroids] | <b>HR (95% CI)</b> | <b>p value</b> | <b>p value PH assumption</b> |
|-----------------------------------------------------------------------|--------------------|----------------|------------------------------|
| <b>Death</b>                                                          |                    |                |                              |
| Monocytes (x10 <sup>9</sup> /l)                                       | 1.57 (1.15-2.13)   | 0.004*         | 0.204                        |
| Lymphocytes (x10 <sup>9</sup> /l)                                     | 0.81 (0.52-1.26)   | 0.353          | 0.238                        |
| Neutrophils (x10 <sup>9</sup> /l)                                     | 1.21 (1.01-1.43)   | 0.038*         | 0.709                        |
| MLR                                                                   | 1.53 (1.02-1.95)   | 0.001*         | 0.123                        |
| NLR                                                                   | 1.24 (1.08-1.43)   | 0.002*         | 0.984                        |
| SIRI                                                                  | 1.08 (1.04-1.13)   | 0.001*         | 0.127                        |
| <b>FVC decline&gt;10%</b>                                             |                    |                |                              |
| Monocytes (x10 <sup>9</sup> /l)                                       | 0.57 (0.09-3.54)   | 0.546          | 0.310                        |
| Lymphocytes (x10 <sup>9</sup> /l)                                     | 0.83 (0.52-1.34)   | 0.455          | 0.267                        |
| Neutrophils (x10 <sup>9</sup> /l)                                     | 1.32 (1.10-1.58)   | 0.003*         | 0.449                        |
| MLR                                                                   | 1.07 (0.69-1.64)   | 0.778          | 0.535                        |
| NLR                                                                   | 1.27 (1.13-1.42)   | <0.001*        | 0.186                        |
| SIRI                                                                  | 1.03 (0.97-1.08)   | 0.338          | 0.149                        |

**Table S1.** Multivariate Cox proportional hazard analysis for outcomes of survival, and lung function decline adjusted for age, gender, baseline FVC% and steroid use at clinic visit during follow up. For all multivariate models testing contribution of blood leukocytes against outcome these were all tested in combination [absolute monocyte, lymphocyte, and neutrophils] to explore interaction. For multivariate models exploring contribution of the leukocyte derived indexes [MLN, NLR or SIRI] these were tested individually and in absence of other leukocytes measurements or derived indexes. All adjusted covariates in each model satisfied the proportional hazard assumption. P values <0.05 are considered significant. MLR; monocyte/lymphocyte ratio, NLR; neutrophil/lymphocyte ratio, SIRI; systemic inflammatory response index.
